# Supplementary material for: Developmental Disorder Probability Scores at 6–18 Years Old in Relation to In-Utero/Peripartum Antiretroviral Drug Exposure among Ugandan Children
Source: MDPI journal article supplement (doi:10.3390/ijerph19063725), 2022-03-21
Supplement: s1 [file s1]

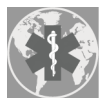

Article

# Developmental Disorder Probability Scores at 6–18 Years Old in Relation to In-Utero/Peripartum Antiretroviral Drug Exposure among Ugandan Children

## Supplementary Materials

**Table S1.** Biological sex, developmental stage, and early-life factors in relationship to ADHD, ASD, and EBD probability indices and overall resiliency among 6–18-year-old children from Uganda.

|                                          | ADHD Probability Index |              |                      | ASD Probability Index |                      | EBD Probability Index |                      | Resiliency Index |                     |
|------------------------------------------|------------------------|--------------|----------------------|-----------------------|----------------------|-----------------------|----------------------|------------------|---------------------|
|                                          | n                      | LSM ± SE     | SMD (95% CI)         | LSM ± SE              | SMD (95% CI)         | LSM ± SE              | SMD (95% CI)         | LSM ± SE         | SMD (95% CI)        |
| Child Sex                                |                        |              |                      |                       |                      |                       |                      |                  |                     |
| Female                                   | 390                    | −0.18 ± 0.07 | −0.12 (−0.28, 0.04)  | −0.7 ± 0.06           | −0.06 (−0.18, 0.06)  | 0.14 ± 0.08           | −0.18 (−0.37,−0.07)  | 0.23 ± 0.06      | 0.03 (−0.12, 0.19)  |
| Male                                     | 348                    | −0.06 ± 0.07 | Ref                  | −0.01 ± 0.07          | Ref                  | −0.08 ± 0.07          | Ref                  | 0.19 ± 0.07      | Ref                 |
| Apgar Score at Birth (per unit increase) | n/a                    | –            | −0.06 (−0.15, 0.03)  | –                     | −0.12 (−0.20, −0.03) | –                     | −0.04 (−0.10,0.02)   | –                | 0.14 (0.05, 0.23)   |
| Birthweight (per kg increase)            | n/a                    | –            | −0.19 (−0.39, −0.00) | –                     | −0.18 (−0.33,−0.03)  | –                     | −0.02 (−0.16, 0.12)  | –                | 0.13 (−0.02, 0.27)  |
| Lifetime Adversity                       |                        |              |                      |                       |                      |                       |                      |                  |                     |
| Low                                      | 389                    | −0.03 ± 0.06 | 0.22 (0.09, 0.35)    | 0.03 ± 0.06           | 0.21 (0.09, 0.34)    | 0.12 ± 0.06           | 0.26 (0.14, 0.38)    | 0.12 ± 0.05      | −0.06 (−0.19, 0.08) |
| High                                     | 366                    | −0.25 ± 0.07 | Ref                  | −0.18 ± 0.05          | Ref                  | −0.14 ± 0.06          | Ref                  | 0.18 ± 0.06      | Ref                 |
| Caregiver Depression                     |                        |              |                      |                       |                      |                       |                      |                  |                     |
| Not depressed                            | 596                    | −0.16 ± 0.05 | −0.07 (−0.22, 0.09)  | −0.13 ± 0.05          | −0.12 (−0.28, 0.04)  | −0.12 ± 0.05          | −0.25 (−0.42, −0.08) | 0.10 ± 0.05      | −0.10 (−0.24, 0.05) |
| Depressed                                | 159                    | −0.09 ± 0.08 | Ref                  | −0.01 ± 0.08          | Ref                  | 0.13 ± 0.08           | Ref                  | 0.20 ± 0.07      | Ref                 |
| Functioning in Caregiving Role           |                        |              |                      |                       |                      |                       |                      |                  |                     |
| Lowest Tertile                           | 186                    | −0.14 ± 0.08 | 0.13 (−0.03, 0.30)   | −0.06 ± 0.07          | 0.17 (0.02, 0.32)    | 0.09 ± 0.07           | 0.35 (0.18, 0.52)    | 0.16 ± 0.06      | −0.01 (−0.18, 0.16) |
| Middle Tertile                           | 363                    | 0.05 ± 0.08  | 0.32 (0.18, 0.49)    | 0.07 ± 0.06           | 0.29 (0.14, 0.44)    | 0.18 ± 0.07           | 0.45 (0.29, 0.60)    | 0.11 ± 0.07      | −0.07 (−0.22, 0.09) |
| Highest Tertile                          | 206                    | −0.28 ± 0.07 | Ref                  | −0.22 ± 0.08          | Ref                  | −0.27 ± 0.07          | Ref                  | 0.18 ± 0.07      | Ref                 |

Multivariable regression models adjusted for child (age, sex), caregiver (education, lifetime adversity, depressive symptoms, caregiver functioning in caregiving role, social support), and early-life child health indicators (birthweight, APGAR score); n/a = not applicable; bolded associations are statistically significant at alpha = 0.05.

**Table S2.** HIV treatment factors and select demographic factors in relationship to developmental disorder, resiliency, and functional impairment outcomes at 6–18 years of life among children perinatally infected.

|                                |     | ADHD<br>Probability Index | EBD Probability<br>Index | ASD Probability<br>Index | Resiliency Index            | Functional<br>Impairment<br>Index |
|--------------------------------|-----|---------------------------|--------------------------|--------------------------|-----------------------------|-----------------------------------|
|                                | n   | SMD (95% CI)              | SMD (95% CI)             | SMD (95% CI)             | SMD (95% CI)                | SMD (95% CI)                      |
| <b>CD4 Nadir</b>               |     |                           |                          |                          |                             |                                   |
| Lowest (<400, mean = 229)      | 70  | 0.09 (−0.21, 0.39)        | −0.11 (−0.42, 0.20)      | 0.15 (−0.14, 0.45)       | −0.05 (−0.35, 0.27)         | 0.13 (−0.19, 0.46)                |
| Medium (400–689, mean = 535.5) | 77  | 0.12 (−0.17, 0.40)        | −0.13 (−0.44, 0.19)      | <b>0.39 (0.12, 0.67)</b> | −0.12 (−0.41, 0.17)         | 0.21 (−0.10, 0.52)                |
| High (≥690, mean = 1041.52)    | 71  | Ref                       | Ref                      | Ref                      | Ref                         | Ref                               |
| <b>Age at cART Initiation</b>  |     |                           |                          |                          |                             |                                   |
| >18 months                     | 74  | 0.05 (−0.21, 0.33)        | <b>0.29 (0.03, 0.57)</b> | 0.20 (−0.05, 0.45)       | 0.12 (−0.36, 0.13)          | 0.07 (−0.21, 0.35)                |
| ≤18 months                     | 165 | Ref                       | Ref                      | Ref                      | Ref                         | Ref                               |
| <b>Current ART Regimen **</b>  |     |                           |                          |                          |                             |                                   |
| NRTI-based regimen             | 53  | −0.20 (−0.48, 0.08)       | 0.01 (−0.25, 0.27)       | −0.17 (−0.46, 0.11)      | 0.19 (−0.09, 0.49)          | −0.05 (−0.34, 0.24)               |
| NNRTI-based regimen            | 60  | Ref                       | Ref                      | Ref                      | Ref                         | Ref                               |
| PI-based regimen               | 122 | −0.17 (−0.44, 0.10)       | −0.08 (−0.39, 0.23)      | −0.18 (−0.48, 0.11)      | 0.15 (−0.16, 0.46)          | −0.21 (−0.51, 0.11)               |
| No known current ART           | 7   | 0.23 (−0.37, 0.82)        | 0.18 (−0.30, 0.66)       | <b>0.47 (0.01, 0.93)</b> | 0.08 (−0.29, 0.45)          | <b>0.58 (0.07, 1.09)</b>          |
| <b>Lifetime Adversity</b>      |     |                           |                          |                          |                             |                                   |
| High                           | 53  | <b>0.31 (0.07, 0.54)</b>  | <b>0.32 (0.09, 0.54)</b> | <b>0.29 (0.05, 0.52)</b> | 0.13 (−0.40, 0.14)          | <b>0.45 (0.22, 0.68)</b>          |
| Low                            | 189 | Ref                       | Ref                      | Ref                      | Ref                         | Ref                               |
| <b>Birth APGAR score</b>       |     |                           |                          |                          |                             |                                   |
| Per unit increase              | -   | −0.04 (−0.15, 0.07)       | −0.01 (−0.14, 0.12)      | −0.10 (−0.23, 0.02)      | <b>0.14 (0.03, 0.25)</b>    | −0.05 (−0.18, 0.08)               |
| Low Apgar (≤6)                 | 9   | <b>0.67 (0.39, 0.94)</b>  | 0.41 (−0.06, 0.89)       | <b>0.46 (0.11, 0.81)</b> | <b>−0.50 (−0.90, −0.11)</b> | <b>0.31 (0.01, 0.61)</b>          |
| High Apgar (≥7)                | 232 | Ref                       | Ref                      | Ref                      | Ref                         | Ref                               |
| <b>Birth weight</b>            |     |                           |                          |                          |                             |                                   |
| Per Kg increase                | -   | −0.11 (−0.32, 0.10)       | −0.04 (−0.29, 0.22)      | −0.05 (−0.28, 0.18)      | 0.20 (−0.03, 0.43)          | −0.13 (−0.36, 0.10)               |
| LBW (<2500 kg)                 | 16  | 0.08 (−0.33, 0.49)        | −0.16 (−0.66, 0.34)      | 0.20 (−0.16, 0.57)       | −0.34 (−0.76, 0.08)         | 0.07 (−0.41, 0.54)                |
| Normal (≥2500 kg)              | 220 | Ref                       | Ref                      | Ref                      | Ref                         | Ref                               |
| <b>Caregiver functioning</b>   |     |                           |                          |                          |                             |                                   |
| Low                            |     | 0.23 (−0.05, 0.51)        | <b>0.58 (0.29, 0.86)</b> | <b>0.35 (0.07, 0.62)</b> | −0.13 (−0.43, 0.18)         | <b>0.55 (0.24, 0.86)</b>          |
| Moderate                       |     | <b>0.29 (0.03, 0.56)</b>  | <b>0.53 (0.27, 0.79)</b> | <b>0.31 (0.04, 0.57)</b> | −0.17 (−0.44, 0.10)         | <b>0.42 (0.15, 0.68)</b>          |
| High                           |     | Ref                       | Ref                      | Ref                      | Ref                         | Ref                               |

Regression models are sequentially adjusted for respective HIV-related factors: viral suppression, timing of ART initiation, current ART regimen. \*\* PI includes Ritonavir, Atazanavir, or Lopinavir/Kaletra; NNRTI = EFV or NVP; NRTI = Abacavir or TDF inclusive. Bolded numbers are statistically significant associations.

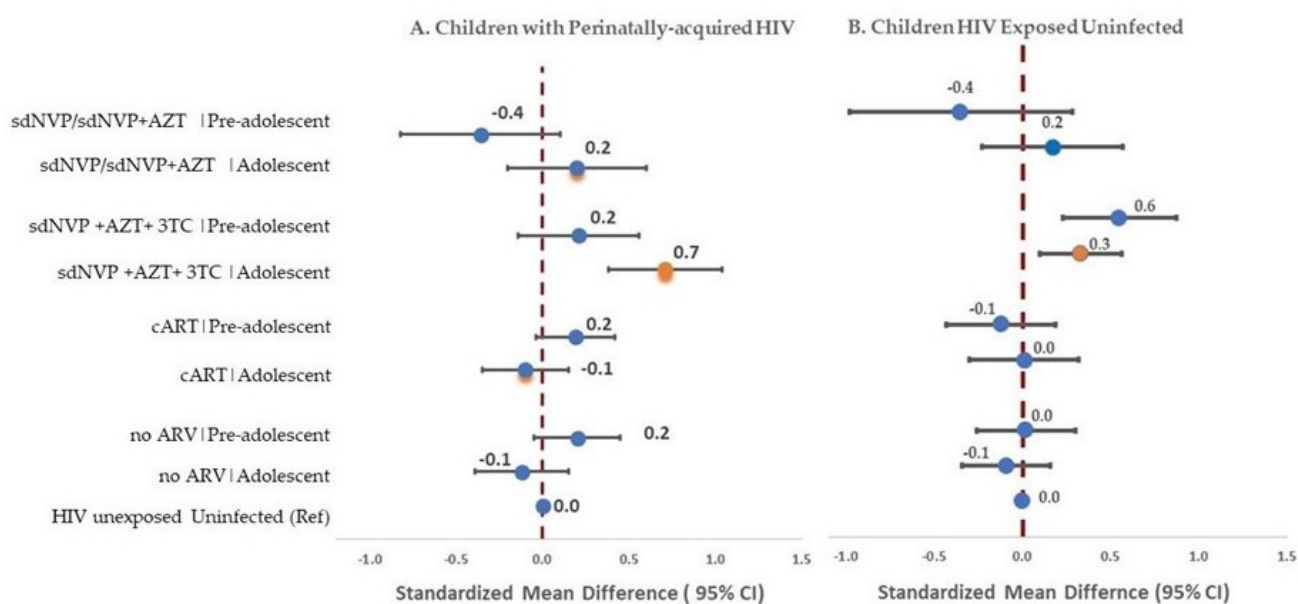

**Figure S1.** Peripartum-ART-exposure associated 12 months-averaged difference in functional impairment score from 6–18 years old according to HIV status and developmental stage.
